# Supplementary material for: Cytotoxic Effects on Gingival Mesenchymal Stromal Cells and Root Surface Modifications Induced by Some Local Antimicrobial Products Used in Periodontitis Treatment
Source: MDPI journal article supplement (doi:10.3390/ma14175049), 2021-09-03
Supplement: s1 [file s1]

# Cytotoxic Effects on Gingival Mesenchymal Stromal Cells and Root Surface Modifications Induced by Some Local Antimicrobial Products Used in Periodontitis Treatment

Irina Lupșe <sup>1,†</sup>, Eموke Pall <sup>2,†</sup>, Lucian Barbu Tudoran <sup>3,4</sup>, Adriana Elena Bulboacă <sup>5</sup>, Andreea Ciurea <sup>6</sup>, Iulia Cristina Micu <sup>6</sup>, Alexandra Roman <sup>6,\*</sup>, Ada Gabriela Delean <sup>7</sup>, Alexandrina Muntean <sup>1</sup> and Andrada Soancă <sup>6</sup>

<sup>1</sup> Department of Paediatric Dentistry, Faculty of Dental Medicine, Iuliu Hațieganu University of Medicine and Pharmacy, Avram Iancu St., No. 31, 400083 Cluj-Napoca, Romania; irinalupse@yahoo.com (I.L.); ortoanda@yahoo.com (A.M.)

<sup>2</sup> Department of Infectious Disease, Faculty of Veterinary Medicine, University of Agricultural Sciences and Veterinary Medicine, 3-5 Mănăștur St., 400372 Cluj-Napoca, Romania; pallemoke@gmail.com

<sup>3</sup> Department of Molecular Biology and Biotechnologies, Faculty of Biology and Geology, Babeș-Bolyai University, Clinicilor St., No. 5-7, 400006 Cluj-Napoca, Romania; lucianbarbu@yahoo.com

<sup>4</sup> Electron Microscopy Integrated Laboratory (LIME), National Institute for Research and Development of Isotopic and Molecular Technologies, INCDTIM, 67-103 Donath St., 400293 Cluj-Napoca, Romania

<sup>5</sup> Department of Pathophysiology, Iuliu Hațieganu University of Medicine and Pharmacy, 4-6 Victor Babeș St., 400012 Cluj-Napoca, Romania; adriana\_bulboaca@yahoo.com

<sup>6</sup> Department of Periodontology, Faculty of Dental Medicine, Iuliu Hațieganu University of Medicine and Pharmacy, Victor Babeș St., No. 15, 400012 Cluj-Napoca, Romania; andreea\_candea@yahoo.com (A.C.); i.cristina.micu@gmail.com (I.C.M.); andrapopovici@gmail.com (A.S.)

<sup>7</sup> Department of Odontology and Endodontics, Faculty of Dental Medicine, Iuliu Hațieganu University of Medicine and Pharmacy, 400012 Cluj-Napoca, Romania; adadelean@yahoo.com

\* Correspondence: veve\_alexandra@yahoo.com

† The authors contributed equally to the present study and can be regarded, therefore, as being main authors.

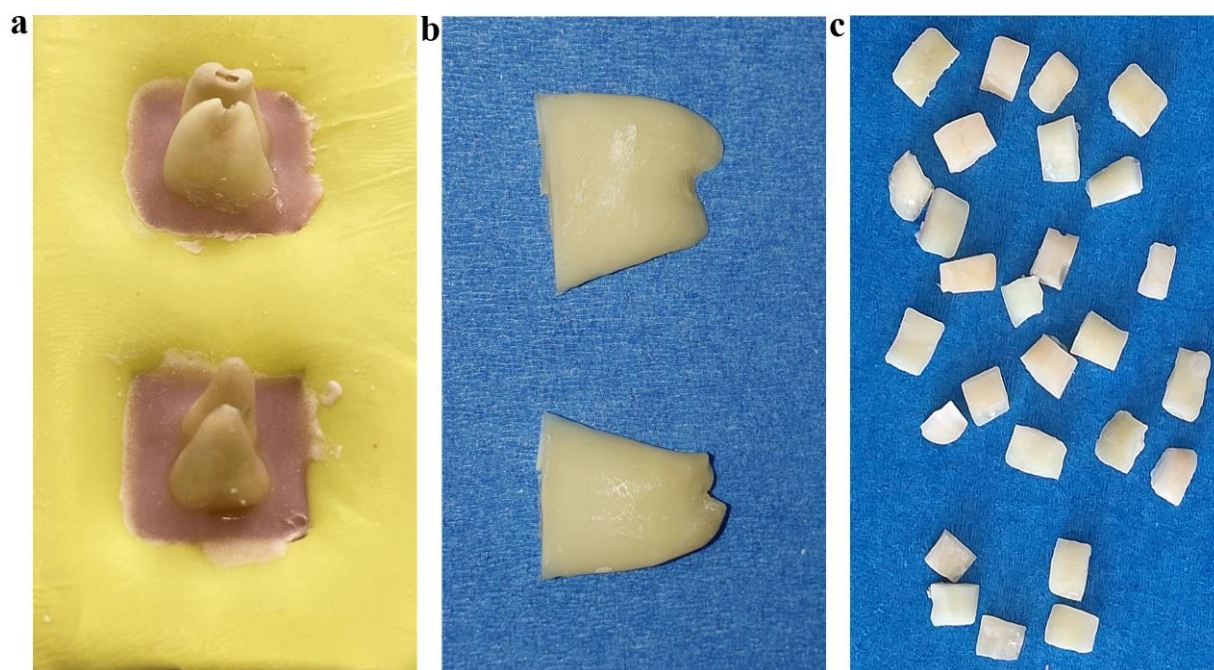

**Figure S1.** Steps in root sectioning. Silicon mounting template containing resin-embedded teeth (a). Fragments of longitudinally sectioned roots (b); Root samples (c).

Table S1. CCK8 and MTT test values.

| Test     | Time   | Product | Concentration (Mean $\pm$ SD) (Optical Density for CCK, % Cell Viability for MTT) |                        |                       |                       |                       |                      |
|----------|--------|---------|-----------------------------------------------------------------------------------|------------------------|-----------------------|-----------------------|-----------------------|----------------------|
|          |        |         | 50%                                                                               | 20%                    | 10%                   | 5%                    | 2%                    | Control              |
| CCK test | 48 h   | HI      | 0.24766<br>(0.01234)                                                              | 0.262 (0.03005)        | 0.26266<br>(0.00838)  | 0.278 (0.006)         | 0.275<br>(0.00458)    | 0.285 (0.02893)      |
|          |        | PS      | 0.177<br>(0.00793)                                                                | 0.17433<br>(0.015144)  | 0.25966<br>(0.00321)  | 0.27266<br>(0.00665)  | 0.27833<br>(0.00702)  | 0.285 (0.02893)      |
|          |        | PF      | 0.14766<br>(0.01422)                                                              | 0.18033<br>(0.00763)   | 0.20666<br>(0.00929)  | 0.207<br>(0.05494)    | 0.21266<br>(0.04099)  | 0.285 (0.02893)      |
|          | 5 days | HI      | 0.47933<br>(0.02411)                                                              | 0.51 (0.01081)         | 0.51533<br>(0.00513)  | 0.546 (0.007)         | 0.53833<br>(0.01975)  | 0.55266<br>(0.01059) |
|          |        | PS      | 0.36366<br>(0.00737)                                                              | 0.418 (0.07015)        | 0.52066<br>(0.06741)  | 0.53366<br>(0.04416)  | 0.54133<br>(0.01205)  | 0.55266<br>(0.01059) |
|          |        | PF      | 0.41733<br>(0.02893)                                                              | 0.43066<br>(0.04373)   | 0.42433<br>(0.0155)   | 0.45633<br>(0.04801)  | 0.494<br>(0.01928)    | 0.55266<br>(0.01059) |
| MTT test | 24 h   | HI      | 60.50815<br>(6.03281)                                                             | 75.42372<br>(10.23595) | 82.62711<br>(14.1601) | 81.77966<br>(8.98677) | 80.9322<br>(2.49066)  | 100 (0)              |
|          |        | PS      | 63.90374<br>(10.70935)                                                            | 71.39037<br>(10.1317)  | 92.51336<br>(17.4227) | 96.39037<br>(14.0836) | 95.18716<br>(3.06329) | 100 (0)              |
|          |        | PF      | 57.35294<br>(6.03281)                                                             | 70.72192<br>(6.03281)  | 70.18716<br>(14.1601) | 75 (8.98677)          | 78.877<br>(2.49066)   | 100 (0)              |

HI=HybenX; PS=Perisolv; PF=Perioflush; CTRL=Control.
